# Supplementary material
Source: PubMed Central journal article supplement (PMC6005735)
Supplement: NIHMS951452-supplement-Supplemental_Data_File___doc___tif__pdf__etc__.pdf [file NIHMS951452-supplement-Supplemental_Data_File___doc___tif__pdf__etc__.pdf]

# Digital Supplement: Inclusion of Unstructured Clinical Text Improves Early Prediction of Death or Prolonged ICU Stay

*Critical Care Medicine, 2018*

Gary E. Weissman, Rebecca A. Hubbard, Lyle H. Ungar, Michael O. Harhay, Casey S. Greene, Blanca E. Himes, Scott D. Halpern

## Supplemental Methods

### Machine Learning Methods

#### *Logistic regression*

We developed two types of logistic regression models in this study. First, a standard model was trained with predictor variable inputs as described in the main analysis. Second, we trained an elastic net model that “penalizes” complex models with non-zero coefficients, thus reducing the number of variables in a final model (1). A grid search determined the optimal combination of the mixing and regularization parameters for the elastic net model.

#### *Tree-based models*

We developed two types of tree-based models in this study. First, we fit a random forest model which generates a weighted prediction based on predictive performance across many smaller trees using repeatedly sampled random subsets of variables (2). A grid search determined the optimal number of variables to consider at each node in the tree. Second, we trained a gradient boosting machine model that trains a series of trees where each subsequent tree attempts to correct the errors of the prior trees (3). For this model, a grid search determined the optimal number of trees, the number of splits to perform on each tree, the regularization parameter, and the minimum number of observations in each terminal node.

### Structured Data Sources

Models included continuous variables for age (years), urine output (cc/kg/hr), and modified Elixhauser score (4–7), and the most severe value within the first 48 hours of hospital admission of creatinine (mg/dL; highest), white blood cell count (K/ul; highest), platelet count (K/ul; lowest), total bilirubin (mg/dL; highest), arterial partial pressure of oxygen (mmHg; lowest), Glasgow coma scale (lowest), systolic blood pressure (mmHg; lowest), heart rate (beats per minute; highest), and body temperature (Celsius; highest) were included as continuous variables. Categorical variables included gender, admission type (emergency, elective, or urgent), and the presence in the nursing flowsheet within the first 48 hours of mechanical ventilation, ICU admission, and cardiac arrest.

Imputation of missing vitals and lab values was performed by replacing them with the mean of non-missing values (8) rather than excluding them entirely (9) to preserve as many subjects as possible while not biasing the distribution of these variables toward extreme values.

## **Programming languages and libraries**

Data cleaning and visualization tasks were performed with the *data.table* (10) and *ggplot2* (11) packages, respectively. Model training and validation were conducted using the *caret* package (12) with the R language for statistical computing (version 3.3.2) (13). The processing and extraction of variables from the text of clinical notes used the *Natural Language Toolkit* (14) and *scikit-learn* (15) modules for the Python programming language (version 3.5.1).

## **Unstructured Data Sources and Natural Language Processing Tasks**

Natural language processing (NLP) techniques encompass a broad variety of tasks that researchers might use to extract relevant information from clinical text (18). First, the use of medical abbreviations are common, and if not counted, may miss the fact that “PND” is another use of “paroxysmal nocturnal dyspnea”. However, if not also disambiguated, may miss that “PND” could also mean “post-nasal drip” in a different context. Although attempts have been made to overcome these abbreviation expansion and disambiguation issues, no gold standard exists for this task (19). Second, the copy-and-paste problem is also prevalent in the use of electronic health records (20), and potentially biases the identification of important keywords towards older clinical states. The dataset used in this analysis did not contain meta-data on copy/paste origin of text and we were not able to analyze the effect of using such data. Third, the use of relation extraction methods to identify temporal modifiers to terms (e.g. “she used to have chest pain” vs “she has chest pain”) is necessary for understanding the contributions of concepts to an analysis of the present clinical situation. This is a very complex task (21) and was not addressed in this study. Fourth, orthographic (i.e. spelling) errors or variations may also affect the identification of identical terms (e.g. “respiratory” and “respiratroy”). In our previous work (22) in which we used a string similarity matching algorithm to link such similar terms, we found no difference in the overall rates of identification of important concepts, and so this approach was not employed in the present analysis.

Our study did not employ the foregoing NLP tasks. Even so, our approach using n-grams with a penalized regression for feature selection still resulted in significant improvements in the discrimination of the predictive models. This suggests that future work that does incorporate these NLP tasks may demonstrate even greater improvements over models using structured data alone.

## **Supplemental figure e1**

Supplemental figure e1: The sampling and cross-validation strategy used for model development and testing based on Friedman et al. (16)

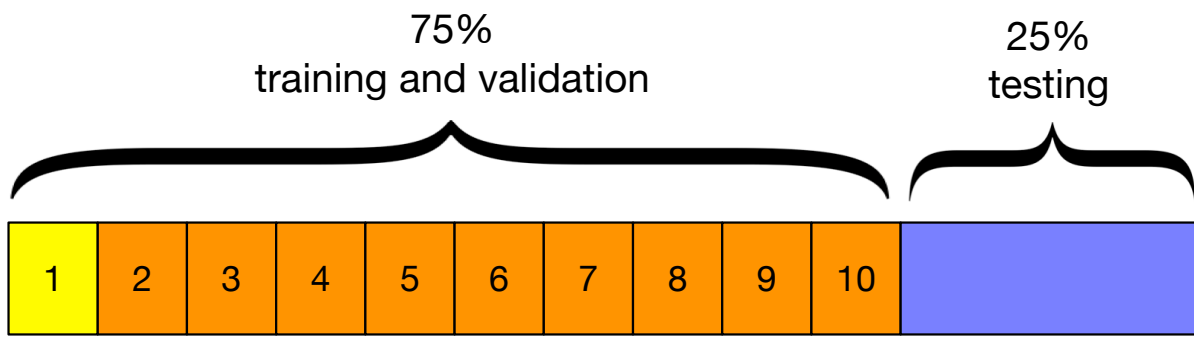

### Supplemental figure e2

Supplemental figure e2: The 10 most important variables by mean relative variable importance across all models using structured data only (A), and both structured and unstructured data (B). Variables representing terms derived from unstructured free-text data are presented within double quotation marks. Abbreviations: PaO<sub>2</sub> = partial pressure of oxygen; GCS = Glasgow coma scale; SBP = systolic blood pressure; WBC = white blood cell count; HR = heart rate.

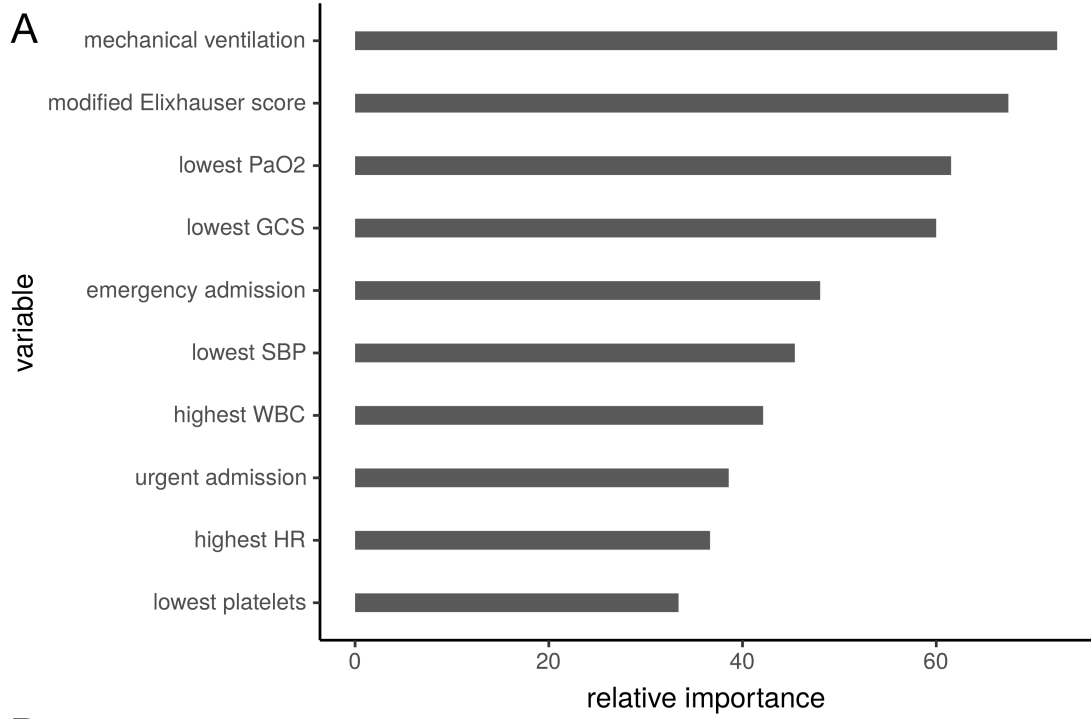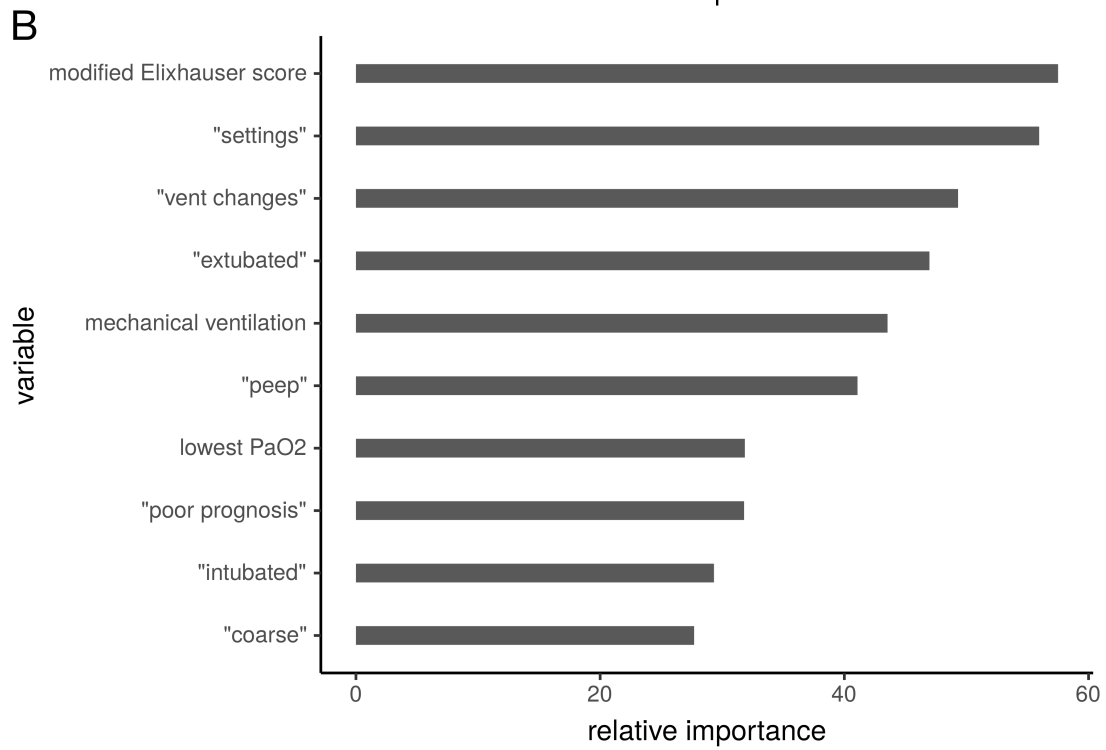

## Secondary Analysis Results

### Restricted 24-hour time horizon

| Model Types                | Unstructured data only |                    | Structured and unstructured data |                    |
|----------------------------|------------------------|--------------------|----------------------------------|--------------------|
|                            | Training               | Testing            | Training                         | Testing            |
| Logistic regression        | 0.80 (0.79 - 0.80)     | 0.80 (0.79 - 0.81) | 0.88 (0.88 - 0.89)               | 0.84 (0.83 - 0.85) |
| Elastic net regression     | 0.80 (0.79 - 0.80)     | 0.80 (0.79 - 0.81) | 0.87 (0.87 - 0.88)               | 0.86 (0.84 - 0.87) |
| Random forests             | 1.00 (1.00 - 1.00)     | 0.82 (0.80 - 0.83) | 1.00 (1.00 - 1.00)               | 0.86 (0.85 - 0.87) |
| Gradient boosting machines | 0.89 (0.88 - 0.89)     | 0.82 (0.81 - 0.84) | 0.94 (0.94 - 0.95)               | 0.88 (0.87 - 0.89) |

### In-hospital death as primary outcome

| Model Types                | Unstructured data only |                    | Structured and unstructured data |                    |
|----------------------------|------------------------|--------------------|----------------------------------|--------------------|
|                            | Training               | Testing            | Training                         | Testing            |
| Logistic regression        | 0.83 (0.82 - 0.84)     | 0.83 (0.81 - 0.85) | 0.93 (0.92 - 0.94)               | 0.83 (0.81 - 0.85) |
| Elastic net regression     | 0.83 (0.82 - 0.84)     | 0.83 (0.81 - 0.85) | 0.92 (0.91 - 0.92)               | 0.86 (0.85 - 0.88) |
| Random forests             | 1.00 (1.00 - 1.00)     | 0.85 (0.83 - 0.86) | 1.00 (1.00 - 1.00)               | 0.87 (0.85 - 0.88) |
| Gradient boosting machines | 0.90 (0.90 - 0.91)     | 0.85 (0.84 - 0.87) | 0.98 (0.98 - 0.98)               | 0.89 (0.88 - 0.90) |

### In-hospital death as primary outcome and restricted 24-hour time horizon

| Model                      | Unstructured data only |                    | Structured and unstructured data |                    |
|----------------------------|------------------------|--------------------|----------------------------------|--------------------|
|                            | Training               | Testing            | Training                         | Testing            |
| Logistic regression        | 0.83 (0.82 - 0.83)     | 0.84 (0.82 - 0.85) | 0.93 (0.92 - 0.93)               | 0.82 (0.80 - 0.84) |
| Elastic net regression     | 0.83 (0.82 - 0.84)     | 0.84 (0.82 - 0.85) | 0.91 (0.91 - 0.92)               | 0.86 (0.84 - 0.87) |
| Random forests             | 1.00 (1.00 - 1.00)     | 0.84 (0.82 - 0.86) | 1.00 (1.00 - 1.00)               | 0.87 (0.85 - 0.88) |
| Gradient boosting machines | 0.92 (0.91 - 0.93)     | 0.85 (0.83 - 0.86) | 0.97 (0.97 - 0.98)               | 0.89 (0.87 - 0.90) |

### In-hospital death and ICU length of stay $\geq 21$ days

| Model                      | Unstructured data only |                    | Structured and unstructured data |                    |
|----------------------------|------------------------|--------------------|----------------------------------|--------------------|
|                            | Training               | Testing            | Training                         | Testing            |
| Logistic regression        | 0.81 (0.80 - 0.82)     | 0.81 (0.80 - 0.83) | 0.91 (0.90 - 0.92)               | 0.85 (0.83 - 0.86) |
| Elastic net regression     | 0.81 (0.80 - 0.82)     | 0.81 (0.80 - 0.83) | 0.90 (0.89 - 0.91)               | 0.87 (0.86 - 0.88) |
| Random forests             | 1.00 (1.00 - 1.00)     | 0.83 (0.82 - 0.85) | 1.00 (1.00 - 1.00)               | 0.87 (0.85 - 0.88) |
| Gradient boosting machines | 0.92 (0.91 - 0.93)     | 0.84 (0.83 - 0.86) | 0.97 (0.96 - 0.97)               | 0.89 (0.88 - 0.90) |

### Without using modified Elixhauser score for comorbidity adjustment

| Model                      | Unstructured data only |                    | Structured and unstructured data |                    |
|----------------------------|------------------------|--------------------|----------------------------------|--------------------|
|                            | Training               | Testing            | Training                         | Testing            |
| Logistic regression        | 0.78 (0.77 - 0.79)     | 0.77 (0.76 - 0.79) | 0.89 (0.88 - 0.90)               | 0.86 (0.84 - 0.87) |
| Elastic net regression     | 0.78 (0.77 - 0.79)     | 0.77 (0.76 - 0.79) | 0.88 (0.87 - 0.89)               | 0.87 (0.85 - 0.88) |
| Random forests             | 1.00 (1.00 - 1.00)     | 0.81 (0.79 - 0.82) | 1.00 (1.00 - 1.00)               | 0.87 (0.86 - 0.88) |
| Gradient boosting machines | 0.88 (0.87 - 0.89)     | 0.81 (0.80 - 0.83) | 0.95 (0.95 - 0.96)               | 0.89 (0.88 - 0.90) |

## Parsimonious model with 25 input variables only

This sensitivity analysis used only the following variables:

Variable

---

“coarse”

“diet”

“extubate”

“extubated”

“extubation”

“intubated”

“oob”

“peep”

“settings”

“to floor”

“transfer”

“vent changes”

age

highest creatinine

highest heart rate

highest temperature

highest total bilirubin

highest WBC

lowest PaO<sub>2</sub>

lowest platelets

lowest systolic blood pressure

mechanical ventilation

modified Elixhauser score

urine output (cc/kg/hr)

word count

**Supplemental figure e3:** Receiver operating characteristic curve of a parsimonious gradient boosting machine model using only the 25 most predictive structured and unstructured variables from the equivalent model primary analysis.

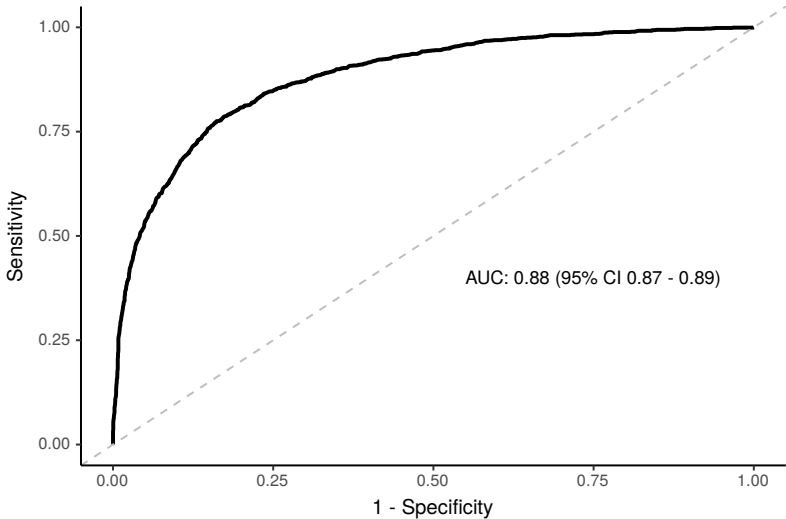

**Supplemental figure e4:** Calibration plot of a parsimonious gradient boosting machine model using only the 25 most predictive structured and unstructured variables from the equivalent model primary analysis.

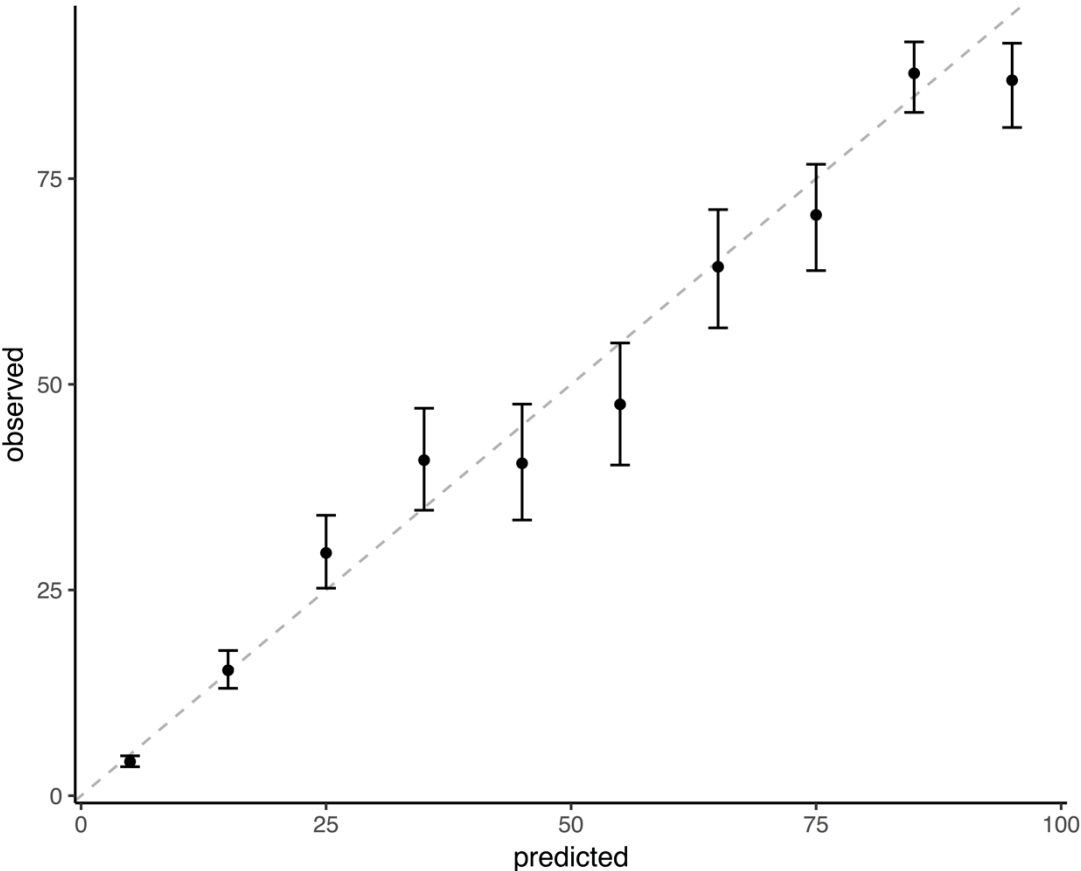

## Supplemental table e1

Terms chosen *a priori* by the investigators to include as potential covariates in the prediction model with hypothesized likelihood of association with in-hospital mortality or long ICU stay.

### Term

---

code status  
comfort care  
comfortable  
death  
die  
doesn't want  
family meeting  
family  
goals of care  
high risk  
hospice  
mortality  
mortal  
pall care  
palliation  
palliative care  
palliative  
poor prognosis  
survival  
wishes  
wouldn't want



## Supplemental table e2

The 500 most predictive terms in the text based on the training sample only, sorted by the absolute value of the estimated log odds of their association (integer counts of occurrences within the text) with the composite outcome of in-hospital mortality or ICU length of stay  $\geq$  7 days.

| Term           | Log odds   |                    |            |
|----------------|------------|--------------------|------------|
| wouldnt want   | 1.2349049  | made               | 0.2092553  |
| palliation     | -1.2283002 | extubation         | -0.2037455 |
| poor prognosis | 1.0261102  | copd               | 0.2018440  |
| pall care      | -1.0014613 | tylenol            | -0.2018124 |
| hospice        | 0.7446242  | ffp                | 0.2007944  |
| goals of care  | 0.6002987  | oob                | -0.1967852 |
| jaundice       | 0.4093547  | pvc                | 0.1965917  |
| palliative     | 0.3727337  | tcurrent 37        | -0.1945104 |
| hcts           | -0.3722134 | weaned to          | -0.1928535 |
| liver          | 0.3670741  | code               | 0.1928329  |
| oob to         | -0.3474088 | rhythm o2 delivery | -0.1887645 |
| comfort care   | 0.3418602  | intubated          | 0.1875484  |
| pupil          | 0.3169450  | increasing         | 0.1864842  |
| afib           | 0.3163799  | teaching           | -0.1847027 |
| extubated      | -0.2666501 | ptt inr 14         | -0.1823858 |
| call out       | -0.2657204 | 99                 | -0.1802441 |
| coccyx         | 0.2559220  | no seizure         | -0.1775675 |
| for comfort    | 0.2544545  | coags              | 0.1762576  |
| albumin        | 0.2529668  | line placed        | 0.1737880  |
| withdraws      | 0.2475301  | us                 | 0.1727993  |
| meeting        | 0.2327209  | confusion          | 0.1725332  |
| nrb            | 0.2301489  | 78                 | 0.1708512  |
| wbc 10         | -0.2286248 | 30cc               | 0.1691497  |
| sit            | -0.2267999 | neuro exam         | 0.1687781  |
| stimuli        | 0.2206194  | higher             | -0.1682006 |
| levo           | 0.2183787  | family meeting     | 0.1667954  |
| to floor       | -0.2171613 | condition          | 0.1667366  |
| started for    | 0.2108040  | crackles           | 0.1661240  |
| diet           | -0.2101539 | vomited            | 0.1660709  |
| obese          | -0.2093904 | resp               | 0.1659120  |
|                |            | vit                | 0.1638364  |

|                       |            |                     |            |
|-----------------------|------------|---------------------|------------|
| and draining          | 0.1622617  | urine culture       | -0.1196400 |
| tachypneic            | 0.1595002  | awoke               | -0.1188748 |
| resp rate             | 0.1589393  | creat               | 0.1181299  |
| wean as               | -0.1560710 | colored             | 0.1178844  |
| atelectasis           | -0.1547596 | qid                 | 0.1168911  |
| discuss               | 0.1534775  | compression         | 0.1162134  |
| hosp                  | 0.1532891  | name5               | -0.1145222 |
| transfer to floor     | -0.1523745 | amber urine         | 0.1133570  |
| status                | 0.1505920  | firm                | 0.1131818  |
| deep breathing        | -0.1502667 | sediment            | -0.1130109 |
| clear yellow          | -0.1496122 | lr                  | -0.1127376 |
| coarse                | 0.1490516  | the key portions    | -0.1119715 |
| resection             | 0.1467760  | ongoing             | -0.1110143 |
| decision              | 0.1441715  | ngt                 | 0.1106843  |
| inch admission weight | -0.1433891 | sedated on propofol | -0.1102541 |
| abp                   | 0.1431900  | they                | 0.1077453  |
| abd is soft           | -0.1407238 | response to         | 0.1068395  |
| sent for              | 0.1393743  | cool                | 0.1067955  |
| son                   | 0.1391633  | well                | -0.1062959 |
| poor                  | 0.1380455  | adequate            | -0.1061267 |
| to self               | 0.1370443  | advanced            | -0.1060617 |
| csm                   | -0.1357409 | to sleep            | -0.1057657 |
| sat 97                | -0.1356393 | coumadin            | -0.1056472 |
| clamped               | 0.1350838  | bs coarse           | -0.1042164 |
| breakdown             | 0.1348516  | pt not              | 0.1041013  |
| endo insulin          | -0.1319175 | lung                | 0.1025791  |
| encouraged            | -0.1298372 | air                 | -0.1015915 |
| painful               | 0.1285621  | bm this             | -0.0999619 |
| doppler               | 0.1281939  | death               | 0.0993629  |
| on room air           | -0.1235033 | blood tinged        | 0.0985198  |
| pain                  | -0.1231860 | called out to       | -0.0972372 |
| will hold             | 0.1229751  | close               | -0.0970817 |
| and increased         | 0.1222616  | monitoring          | -0.0969307 |
| lift                  | -0.1213521 | incisional pain     | -0.0969305 |
| male with             | 0.1210935  | decreased           | 0.0967698  |
| integ                 | 0.1201746  | amiodarone          | 0.0964373  |

|                        |            |                       |            |
|------------------------|------------|-----------------------|------------|
| none spo2              | -0.0962166 | brisk                 | -0.0811818 |
| hemorrhage             | 0.0961836  | his wife              | 0.0809158  |
| ew                     | -0.0956478 | clear yellow urine    | -0.0809050 |
| hemodynamically stable | -0.0947767 | to keep sbp           | 0.0806568  |
| better                 | -0.0944681 | nsr                   | -0.0806411 |
| rr 12                  | -0.0937882 | 40cc hr               | 0.0803064  |
| wake                   | -0.0937284 | tolerating            | -0.0802265 |
| stable                 | -0.0919050 | on 40                 | -0.0788982 |
| jp                     | -0.0916081 | upper                 | 0.0786752  |
| brown                  | 0.0913397  | fever                 | -0.0785291 |
| hr and                 | -0.0910317 | await                 | 0.0775587  |
| able to                | -0.0909471 | remains intubated and | 0.0775256  |
| depression             | -0.0907620 | section               | -0.0775219 |
| noted to               | 0.0904827  | amounts of thick      | -0.0770698 |
| absent left            | -0.0903952 | ground                | 0.0770367  |
| bil                    | -0.0895086 | children              | 0.0767200  |
| syndrome               | 0.0893703  | monitor vs            | -0.0766305 |
| wnl                    | -0.0892768 | resolved              | -0.0760909 |
| able to wean           | -0.0882943 | dl ldh                | -0.0757747 |
| sb                     | -0.0881672 | open                  | 0.0755961  |
| with family            | 0.0877257  | throughout            | 0.0750056  |
| 250cc                  | 0.0876955  | low grade             | -0.0748376 |
| iv access              | -0.0876190 | po                    | -0.0739339 |
| answer                 | -0.0875148 | sob and               | 0.0732318  |
| very pleasant          | -0.0873701 | sounds present no     | -0.0728116 |
| became                 | 0.0873367  | until                 | -0.0727457 |
| of clear               | -0.0862285 | chest ct              | 0.0723189  |
| unresponsive           | 0.0862083  | completed             | -0.0721254 |
| wires                  | -0.0855609 | please see carevue    | 0.0720350  |
| form                   | -0.0846658 | covered with          | 0.0714437  |
| done                   | 0.0843260  | for                   | 0.0713078  |
| 155                    | 0.0839316  | wean vent             | -0.0708337 |
| ace                    | -0.0829121 | ue                    | 0.0707617  |
| received total         | -0.0822732 | would be              | 0.0707598  |
| effusion               | 0.0819425  | respiratory care pt   | -0.0707289 |
| transfer               | -0.0812290 | to make               | 0.0705645  |

|                    |            |               |            |
|--------------------|------------|---------------|------------|
| labile             | 0.0702871  | appropriately | -0.0617282 |
| q2                 | -0.0702210 | adequate amts | -0.0614802 |
| femoral            | 0.0690776  | wants         | 0.0614676  |
| no changes         | 0.0686173  | trauma        | -0.0613460 |
| cooperative        | -0.0685695 | central       | 0.0610166  |
| clear              | -0.0683661 | and was       | -0.0608678 |
| 97 abg             | -0.0683448 | 70 90         | -0.0607148 |
| awake              | -0.0678976 | min spo2 99   | -0.0605990 |
| this am with       | -0.0678888 | extubate      | -0.0603336 |
| 12 am              | -0.0678574 | dopamine      | 0.0602402  |
| to decrease        | 0.0678325  | placement     | 0.0590904  |
| unchanged          | 0.0674402  | 11            | 0.0588919  |
| hcp                | 0.0672108  | marginal      | 0.0581989  |
| 2u                 | 0.0671761  | no sob        | -0.0581938 |
| bowel regimen      | -0.0666411 | generalized   | 0.0579898  |
| dilantin           | 0.0665557  | too           | -0.0579591 |
| soft nontender     | -0.0665553 | lower         | 0.0579456  |
| wbc hct            | -0.0665355 | on cmv        | 0.0579200  |
| oriented x3        | -0.0662822 | worsening     | 0.0577038  |
| to painful stimuli | 0.0658659  | left          | 0.0571774  |
| note neuro         | 0.0658275  | repleted      | -0.0571342 |
| pearl              | -0.0655045 | as tolerated  | -0.0567889 |
| most recent        | 0.0653622  | bm            | 0.0567600  |
| benign             | -0.0653472 | ss            | -0.0565686 |
| pupils equal and   | -0.0647768 | weaned and    | -0.0558482 |
| uf heparin stress  | -0.0645102 | hydration     | 0.0555366  |
| father             | -0.0644494 | rising        | 0.0551725  |
| ci                 | -0.0639538 | bronch        | 0.0548900  |
| and on             | -0.0630917 | and versed    | -0.0548090 |
| boluses            | 0.0630118  | due           | 0.0543968  |
| scan               | 0.0629298  | placed on     | 0.0542288  |
| strong             | -0.0628221 | today         | 0.0539958  |
| mostly             | 0.0627935  | associated    | -0.0539259 |
| and fentanyl       | -0.0625297 | healthy       | -0.0532552 |
| services           | -0.0623281 | fluids        | -0.0526945 |
| to 70              | 0.0622012  | by name       | -0.0523174 |

|              |            |                |            |
|--------------|------------|----------------|------------|
| sleeping     | -0.0522945 | plans          | 0.0449128  |
| state        | 0.0522756  | plts           | 0.0447652  |
| colace       | -0.0521106 | revealed       | 0.0447195  |
| weaning      | -0.0520980 | hr 80          | -0.0446010 |
| pull         | -0.0519167 | son name       | 0.0444710  |
| to 30        | 0.0518003  | pt more        | -0.0444255 |
| rr 20        | 0.0513603  | on ra          | -0.0442920 |
| bp and       | 0.0512538  | maintain map   | 0.0441844  |
| of ns        | 0.0511755  | occas          | 0.0441608  |
| pip          | 0.0506808  | improved       | -0.0440403 |
| uti          | -0.0503546 | grade temp     | -0.0430391 |
| tolerate     | 0.0498602  | to increase    | 0.0429691  |
| rr 22        | 0.0496428  | stable on      | 0.0429554  |
| up in        | -0.0494854 | as tol         | -0.0420957 |
| drop         | 0.0491632  | sats 93        | 0.0420402  |
| increased    | 0.0487968  | at bedside     | 0.0418982  |
| voiding      | -0.0482559 | psych          | -0.0418660 |
| easily       | -0.0480021 | is for         | -0.0417775 |
| reddened     | 0.0478586  | foley          | 0.0413868  |
| foley cath   | -0.0477538 | hr to          | -0.0412125 |
| final        | 0.0476737  | mother         | -0.0411882 |
| nods         | -0.0471518 | events pt      | -0.0405802 |
| bp 120       | -0.0469787 | tcurrent 36 98 | -0.0404490 |
| and her      | -0.0468680 | spec           | 0.0400962  |
| due to       | 0.0467913  | needed for     | -0.0398785 |
| hypoxia      | 0.0467648  | 50 mcg         | -0.0398332 |
| equal and    | -0.0467609 | sluggish       | 0.0397646  |
| normal       | -0.0467017 | states that    | -0.0397444 |
| the ed       | -0.0466907 | distended      | 0.0395758  |
| bolus and    | 0.0461039  | strength       | -0.0395573 |
| follows      | -0.0458142 | gtt off        | -0.0388891 |
| titrate      | 0.0454427  | pacer          | -0.0387622 |
| draining     | 0.0454193  | pt states      | -0.0380118 |
| pulses       | -0.0453485 | cefazolin      | -0.0378050 |
| increasingly | 0.0449944  | rr 17          | -0.0375026 |
| total        | -0.0449747 | within         | -0.0374755 |

|              |            |                 |            |
|--------------|------------|-----------------|------------|
| spo2 99      | -0.0373984 | for hypotension | 0.0318674  |
| done and     | -0.0373487 | suctioned small | 0.0314345  |
| phone        | -0.0373230 | possibly        | 0.0311221  |
| closely      | 0.0372033  | cleared         | -0.0306002 |
| be           | 0.0371586  | pantoprazole    | -0.0303851 |
| chest        | -0.0370931 | free            | -0.0297468 |
| rue          | 0.0369502  | rr              | 0.0297097  |
| fall         | 0.0366570  | palpable pulses | -0.0294901 |
| social work  | -0.0366264 | in bed          | -0.0294843 |
| as ordered   | -0.0366235 | to osh          | -0.0292791 |
| spo2 100     | -0.0365425 | vss             | -0.0291775 |
| bilat        | 0.0364992  | spent 35        | -0.0288156 |
| spoke with   | 0.0359904  | will follow     | -0.0286017 |
| for mod      | -0.0359482 | admission       | -0.0285645 |
| peep         | 0.0354804  | ct scan         | 0.0284059  |
| 03           | -0.0353728 | mn              | -0.0283857 |
| beta         | -0.0352711 | maps            | 0.0282046  |
| 60 70        | -0.0349503 | switched        | -0.0281033 |
| with normal  | -0.0347339 | wishes          | 0.0279985  |
| this evening | 0.0346727  | and the         | 0.0278162  |
| ischemic     | 0.0343352  | resp lungs      | -0.0277797 |
| name stitle  | 0.0343096  | reports         | -0.0272953 |
| 98 hr        | -0.0342200 | sinus rhythm    | -0.0270242 |
| head ct      | 0.0340702  | guiac           | 0.0265847  |
| and to       | 0.0339392  | daughter        | 0.0265454  |
| on 4l nc     | 0.0336610  | tomorrow        | -0.0263670 |
| alert        | -0.0334092 | spo2 98         | -0.0263389 |
| improvement  | 0.0333021  | on loproressor  | -0.0262139 |
| family in    | 0.0331802  | gtt started     | 0.0260683  |
| support and  | -0.0327311 | and his         | -0.0251238 |
| 12 00        | -0.0323517 | tmax 100        | -0.0250561 |
| 20 meq       | -0.0323008 | resume          | -0.0248753 |
| sedation and | -0.0321865 | minimally       | 0.0248484  |
| address      | 0.0321749  | at all          | 0.0245230  |
| abdomen      | 0.0320145  | from or         | -0.0244264 |
| weaned       | -0.0319301 | 70s             | 0.0242131  |

|                   |            |                   |            |
|-------------------|------------|-------------------|------------|
| and daughter      | 0.0241661  | uo                | 0.0191854  |
| db                | -0.0238271 | tele              | -0.0191684 |
| additional        | -0.0236754 | vanco             | 0.0190041  |
| ice               | -0.0236097 | ed                | -0.0189523 |
| obtain            | 0.0232972  | aware             | 0.0184764  |
| nose              | -0.0230885 | unlabored         | -0.0181546 |
| encourage         | -0.0229505 | abd pain          | 0.0181064  |
| in good           | -0.0225792 | cont to monitor   | -0.0176443 |
| ciwa              | -0.0225748 | discharge         | -0.0174784 |
| ra                | -0.0224272 | barrier           | -0.0174464 |
| weakness          | 0.0224097  | to 100            | -0.0173078 |
| toilet            | -0.0223856 | room air          | -0.0170826 |
| overbreathing     | 0.0222335  | with increased    | -0.0168565 |
| hrs               | -0.0219154 | 30cc hr           | 0.0167193  |
| for meds          | 0.0219052  | bronchial         | 0.0165429  |
| be done           | 0.0218213  | placed            | 0.0162557  |
| despite           | 0.0217501  | occ               | 0.0162517  |
| bloody            | 0.0216054  | thick white       | -0.0162263 |
| hr of             | -0.0214436 | map 60            | 0.0157581  |
| when she          | -0.0213723 | reported          | -0.0157530 |
| elevated          | 0.0212575  | code full         | -0.0156433 |
| pt npo            | -0.0212376 | if                | -0.0151594 |
| units of          | -0.0211688 | vent changes      | 0.0150982  |
| per orders        | -0.0210212 | endo insulin gtt  | -0.0150445 |
| sr                | -0.0209813 | loss              | 0.0150173  |
| attempted         | 0.0207807  | asleep            | -0.0149252 |
| it was            | 0.0207617  | 3l                | 0.0148696  |
| would like        | 0.0205967  | freq              | 0.0148670  |
| emotional         | 0.0202373  | na                | 0.0147766  |
| no signs          | -0.0202150 | for the           | -0.0145904 |
| in micu           | 0.0201256  | sounds diminished | 0.0145672  |
| neuro pt alert    | -0.0197525 | transported       | 0.0142698  |
| clear bilaterally | -0.0196722 | mental            | 0.0142347  |
| hours             | -0.0195959 | settings          | 0.0140384  |
| questions         | -0.0193225 | working           | -0.0136843 |
| insulin gtt       | -0.0193174 | bp                | 0.0134556  |

|            |            |               |            |
|------------|------------|---------------|------------|
| or         | -0.0132712 | hyperglycemia | -0.0128553 |
| with good  | -0.0131280 | history of    | -0.0127285 |
| discussion | 0.0130703  | 67            | -0.0126486 |
| and wean   | -0.0129695 |               |            |



## Supplemental table e3

| Characteristic, n (%)                   | All                 | Died or ICU LOS $\geq$ 7 days |                    |
|-----------------------------------------|---------------------|-------------------------------|--------------------|
|                                         |                     | Yes                           | No                 |
| Modified Elixhauser score, median (IQR) | 8 (2 – 15)          | 12 (6 – 19)                   | 6 (1 – 13)         |
| Clinical deterioration                  |                     |                               |                    |
| Mechanical ventilation                  | 4,512 (17.4)        | 1,926 (35.0)                  | 2,586 (12.6)       |
| Cardiac arrest                          | 206 (0.8)           | 91 (1.7)                      | 115 (0.6)          |
| ICU transfer                            | 25,614 (98.7)       | 5,427 (98.6)                  | 20,187 (98.7)      |
| Laboratory data, median (IQR)           |                     |                               |                    |
| Creatinine, highest                     | 1.10 (0.80 – 1.60)  | 1.20 (0.90 – 2.10)            | 1.00 (0.80 – 1.50) |
| WBCs, highest                           | 13.0 (9.70 – 17.10) | 14.8 (10.9 – 19.8)            | 12.6 (9.5 – 16.5)  |
| Platelets, lowest                       | 176 (125 – 235)     | 164 (106 – 228)               | 179 (130 – 237)    |
| Total bilirubin, highest                | 1.5 (0.6 – 1.5)     | 1.5 (0.6 – 1.5)               | 1.5 (0.6 – 1.5)    |
| PaO <sub>2</sub> , lowest               | 103 (93 – 103)      | 103 (71 – 103)                | 103 (103 – 103)    |
| Potassium, highest                      | 4.5 (4.2 – 4.9)     | 4.6 (4.2 – 5.1)               | 4.5 (4.1 – 4.9)    |
| Vital signs, median (IQR)               |                     |                               |                    |
| Urine output (cc/kg/hr)                 | 0.85 (0.57 – 0.90)  | 0.85 (0.53 – 0.91)            | 0.85 (0.58 – 0.90) |
| Glasgow coma scale, lowest              | 9 (7 – 14)          | 8 (3 – 9)                     | 9 (9 – 15)         |
| Systolic blood pressure (mmHg), lowest  | 89 (79 – 101)       | 83 (70 – 94)                  | 91 (81 – 102)      |
| Heart rate (beats per minute), highest  | 69 (60 – 78)        | 69 (60 – 80)                  | 68 (60 – 77)       |
| Temperature (°C), highest               | 36.0 (35.6 – 36.4)  | 35.9 (35.4 – 36.4)            | 36.1 (35.6 – 36.4) |
| Clinical notes                          |                     |                               |                    |
| Total raw word count, median (IQR)      | 1,023 (562 – 2,266) | 1,410 (956 – 2,292)           | 899 (501 – 2,247)  |
| Number of notes, median (IQR)           | 6 (4 – 11)          | 8 (6 – 12)                    | 5 (3 – 10)         |

### Supplemental table e4

| Variable                       | Missingness, n (%) | Imputed mean |
|--------------------------------|--------------------|--------------|
| Bilirubin                      | 11,444 (44.1)      | 1.54         |
| Creatinine                     | 40 (0.2)           | 1.66         |
| Glasgow coma scale             | 6,964 (26.8)       | 9.61         |
| Heart rate (bpm)               | 418 (1.6)          | 69.1         |
| Potassium                      | 115 (0.4)          | 4.68         |
| PaO2                           | 1,4021 (54.0)      | 103.0        |
| Platelets                      | 57 (0.2)           | 190.3        |
| Systolic blood pressure (mmHg) | 418 (1.6)          | 86.5         |
| Temperature (C)                | 515 (2.0)          | 35.5         |
| Urine output (cc/kg/hr)        | 8,826 (34.0)       | 0.85         |
| White blood cells              | 84 (0.3)           | 14.4         |
| Weight (kg)                    | 5,422 (21.0)       | 83.3         |

## Supplemental table e5

Machine learning model types and tuning parameters.

| Model family        | Model type                | Tuning parameters                                                                | Software package |
|---------------------|---------------------------|----------------------------------------------------------------------------------|------------------|
| Logistic regression | Traditional               | None                                                                             | Base R           |
|                     | Elastic net               | Mixing, regularization                                                           | glmnet           |
| Tree-based          | Random forest             | Variables per node                                                               | randomForest     |
|                     | Gradient boosting machine | Number of trees, number of splits, regularization, minimum observations per node | gbm              |

# Cross-Validation Performance in the Primary Analysis

Supplemental figure e5: Elastic Net model using structured data only

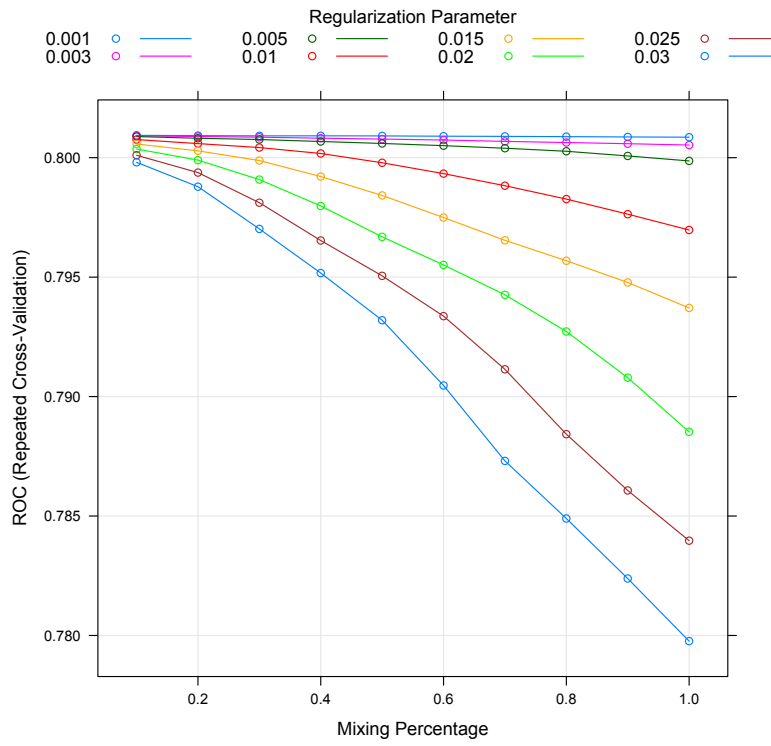

Supplemental figure e6: Random Forest model using structured data only

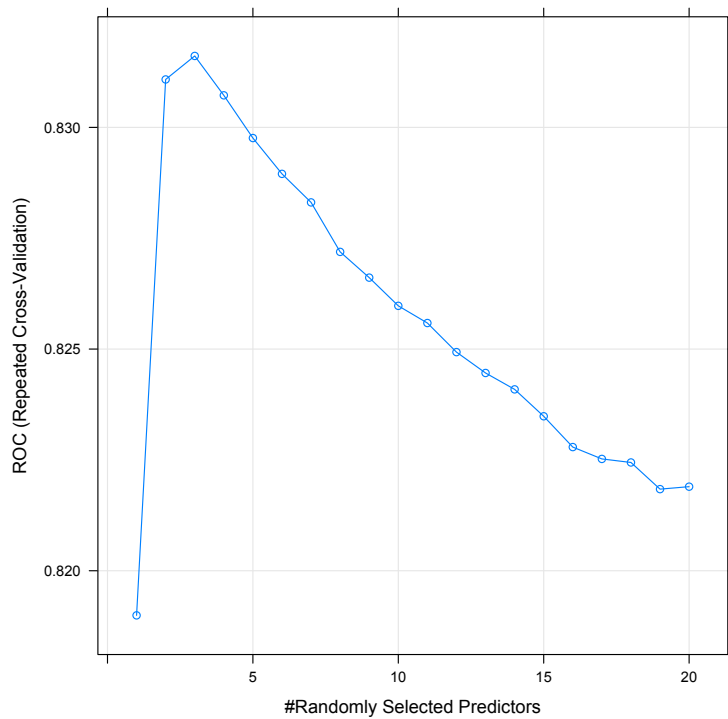

Supplemental figure e7: Gradient Boosting Machine model using structured data only

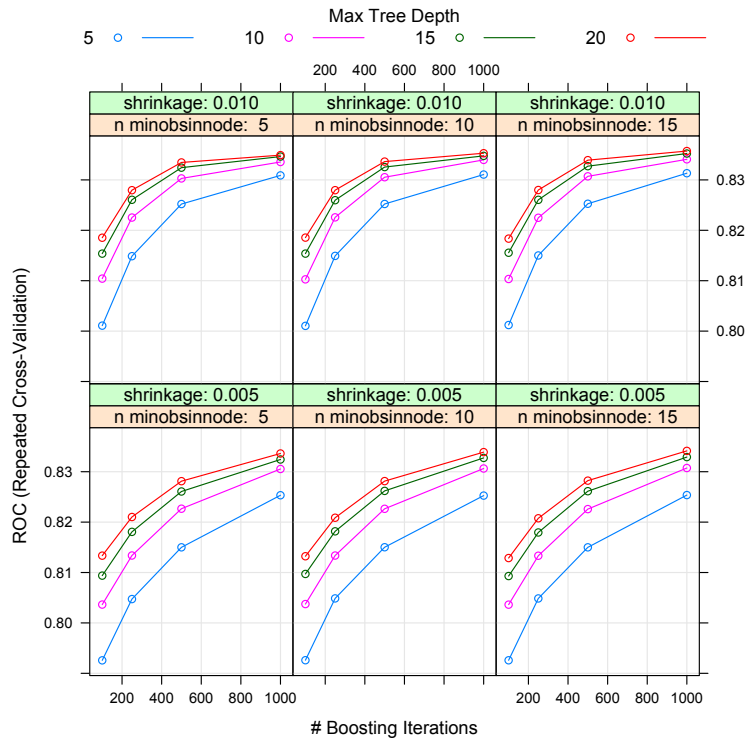

Supplemental figure e8: Elastic Net model using structured and unstructured data

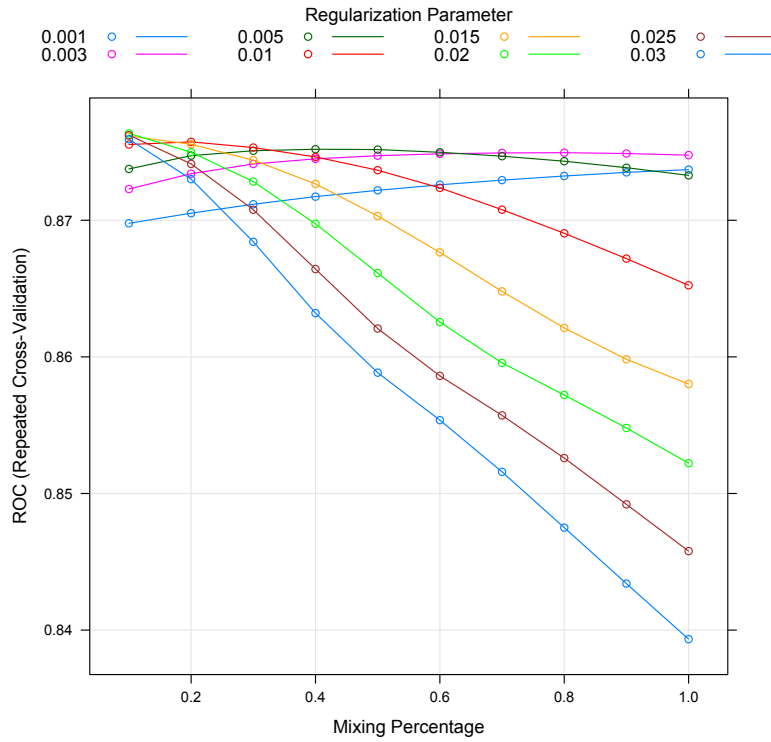

Supplemental figure e9: Random Forest model using structured and unstructured data

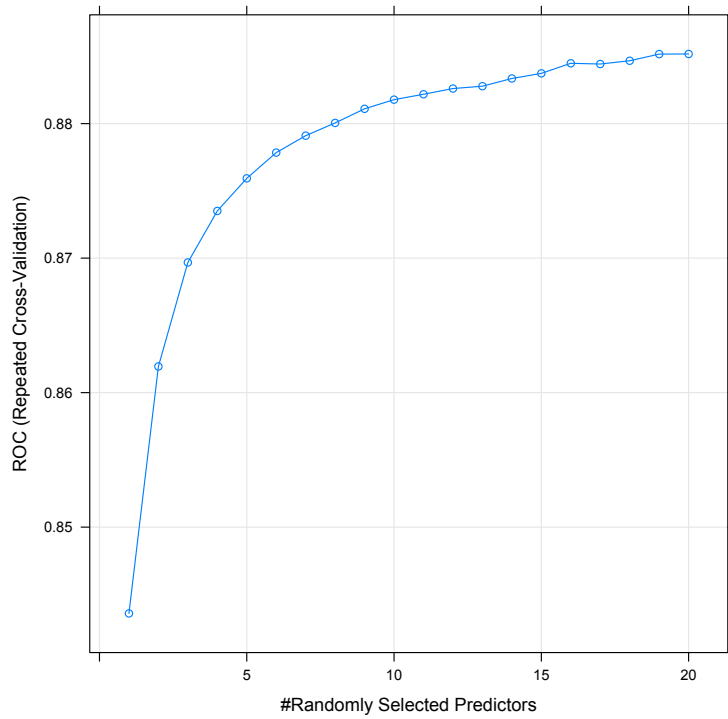

Supplemental figure e10: Gradient Boosting Machine model using structured and unstructured data

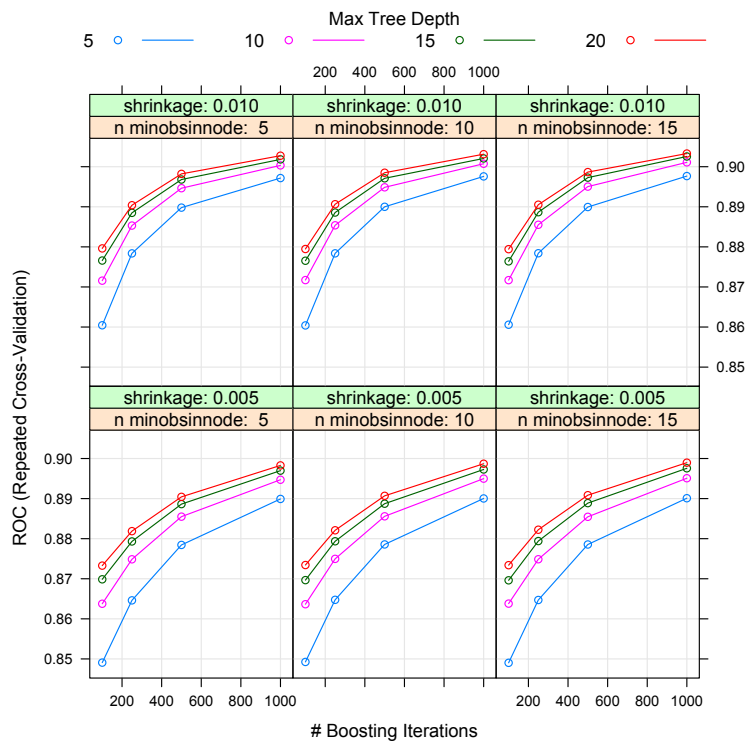

## Model Performance by Hospital Length of Stay

Supplemental figure e11: Mortality and ICU length of stay by hospital length of stay (days)

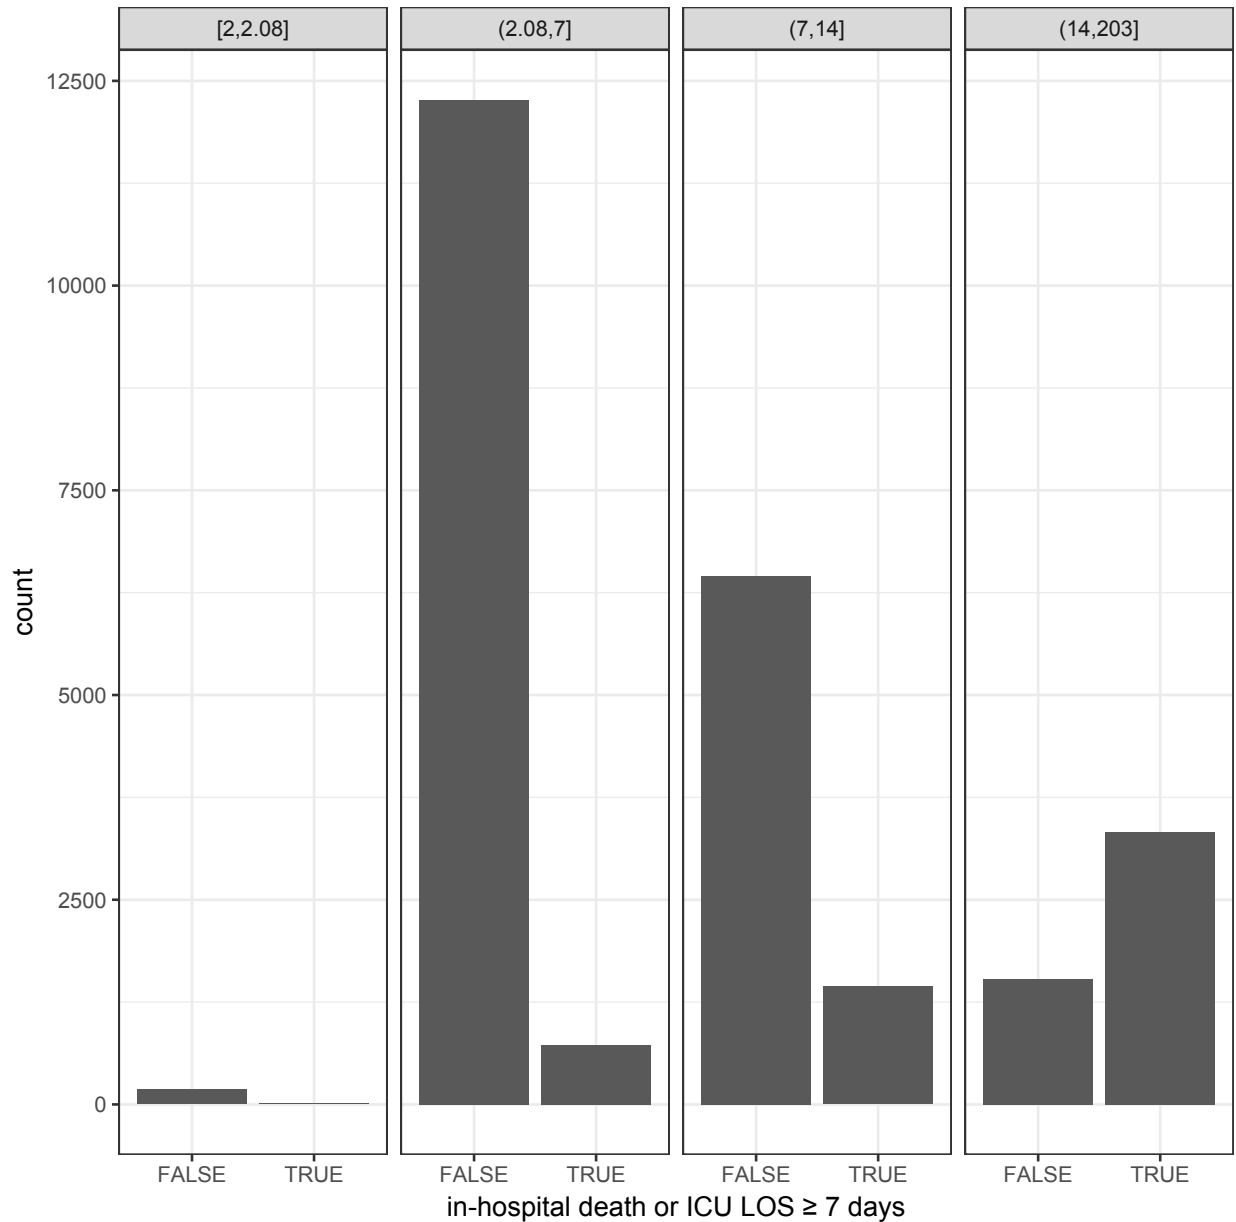

Supplemental table e6: Performance of gradient boosting machine model with text data in the testing sample by hospital length of stay

| Hospital length of stay (days) | C-statistic | 95% confidence interval | Observations (n) |
|--------------------------------|-------------|-------------------------|------------------|
| [2, 2.08]                      | 0.953       | 0.937 – 0.968           | 53               |
| (2.08, 7]                      | 0.830       | 0.805 – 0.854           | 3,268            |
| (7, 14]                        | 0.793       | 0.767 – 0.819           | 1,959            |
| (14, 203]                      | 0.929       | 0.785 – 1.000           | 1,206            |

Supplemental figure e12: LOESS plot with 95% confidence intervals of performance of the gradient boosting machine model using structured and unstructured data as measured by the Brier score over the total hospital length of stay. Both the x- and y-axes have been transformed to a  $\log_{10}$  scale.

Model performance by hospital length of stay

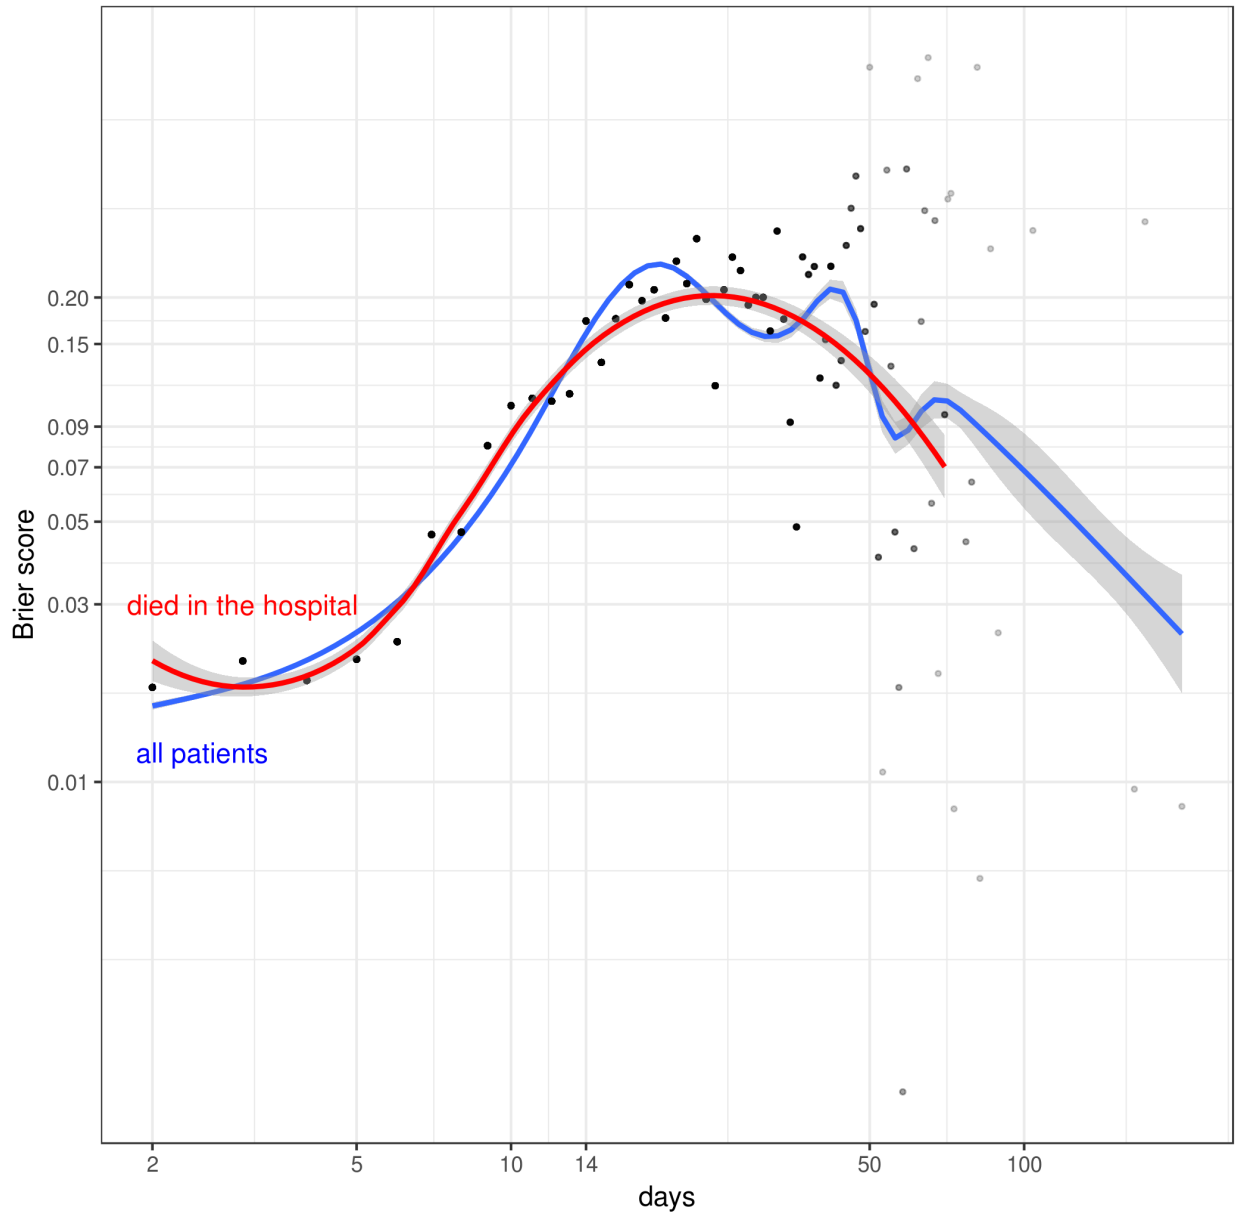



## Additional Model Performance Characteristics

*Supplemental table e7: Sensitivity (Sens), Specificity (Spec), Positive Predictive Value (PPV), Negative Predictive Value (NPV), and F1 Score for all logistic regression (LR), elastic net regression (EN), random forest (RF), and gradient boosting machine (GBM) models using the held-out testing sample. Continuous predicted probabilities are considered positive for  $p \geq 0.5$ .*

| Model | Unstructured data only |       |       |       |       | Structured and unstructured data |       |       |       |       |
|-------|------------------------|-------|-------|-------|-------|----------------------------------|-------|-------|-------|-------|
|       | Sens                   | Spec  | PPV   | NPV   | F1    | Sens                             | Spec  | PPV   | NPV   | F1    |
| LR    | 0.954                  | 0.301 | 0.840 | 0.628 | 0.894 | 0.946                            | 0.539 | 0.888 | 0.720 | 0.916 |
| EN    | 0.954                  | 0.298 | 0.840 | 0.629 | 0.893 | 0.961                            | 0.461 | 0.873 | 0.752 | 0.915 |
| RF    | 0.956                  | 0.339 | 0.847 | 0.667 | 0.899 | 0.962                            | 0.468 | 0.875 | 0.760 | 0.916 |
| GBM   | 0.944                  | 0.401 | 0.859 | 0.650 | 0.899 | 0.950                            | 0.558 | 0.892 | 0.745 | 0.921 |

*Supplemental table e8: Sensitivity (Sens), Specificity (Spec), Positive Predictive Value (PPV), Negative Predictive Value (NPV), and F1 Score for all logistic regression (LR), elastic net regression (EN), random forest (RF), and gradient boosting machine (GBM) models using the held-out testing sample. Continuous predicted probabilities are considered positive based on a probability threshold (Thresh) in each case determined by the Youden method.*

| Model | Thresh | Unstructured data only |       |       |       |       | Structured and unstructured data |       |       |       |       |       |
|-------|--------|------------------------|-------|-------|-------|-------|----------------------------------|-------|-------|-------|-------|-------|
|       |        | Sens                   | Spec  | PPV   | NPV   | F1    | Thresh                           | Sens  | Spec  | PPV   | NPV   | F1    |
| LR    | 0.184  | 0.766                  | 0.685 | 0.386 | 0.919 | 0.513 | 0.184                            | 0.789 | 0.805 | 0.512 | 0.936 | 0.621 |
| EN    | 0.183  | 0.769                  | 0.680 | 0.384 | 0.919 | 0.512 | 0.183                            | 0.813 | 0.786 | 0.496 | 0.942 | 0.616 |
| RF    | 0.229  | 0.751                  | 0.737 | 0.425 | 0.920 | 0.543 | 0.269                            | 0.759 | 0.850 | 0.567 | 0.931 | 0.649 |
| GBM   | 0.205  | 0.728                  | 0.770 | 0.450 | 0.916 | 0.556 | 0.213                            | 0.774 | 0.854 | 0.579 | 0.936 | 0.662 |

## References

1. Simon N, Friedman J, Hastie T, et al.: Regularization paths for Cox's proportional hazards model via coordinate descent. [Internet]. *Journal of statistical software* 2011; 39:1–13 Available from: <http://www.ncbi.nlm.nih.gov/pubmed/27065756>
2. Liaw A, Wiener M: Classification and Regression by randomForest [Internet]. *R News* {2002}; 2:18–22 Available from: {<http://CRAN.R-project.org/doc/Rnews/>}
3. Ridgeway G, contributions from others: gbm: Generalized Boosted Regression Models [Internet]. {2015}. Available from: {<https://CRAN.R-project.org/package=gbm>}
4. McCormick P, Joseph T: medicalrisk: Medical Risk and Comorbidity Tools for ICD-9-CM Data [Internet]. {2016}. Available from: {<https://CRAN.R-project.org/package=medicalrisk>}
5. Walraven C van, Austin PC, Jennings A, et al.: A modification of the Elixhauser comorbidity measures into a point system for hospital death using administrative data. [Internet]. *Medical care* 2009; 47:626–633 Available from: <http://www.ncbi.nlm.nih.gov/pubmed/19433995>
6. Elixhauser A, Steiner C, Harris DR, et al.: Comorbidity measures for use with administrative data. [Internet]. *Medical care* 1998; 36:8–27 Available from: <http://www.ncbi.nlm.nih.gov/pubmed/9431328>
7. Quan H, Sundararajan V, Halfon P, et al.: Coding algorithms for defining comorbidities in icd-9-cm and icd-10 administrative data. [Internet]. *Medical care* 2005; 43:1130–1139 Available from: <http://www.ncbi.nlm.nih.gov/pubmed/16224307>
8. Moreno RP, Metnitz PGH, Almeida E, et al.: SAPS 3—from evaluation of the patient to evaluation of the intensive care unit. part 2: Development of a prognostic model for hospital mortality at icu admission. [Internet]. *Intensive care medicine* 2005; 31:1345–1355 Available from: <http://www.ncbi.nlm.nih.gov/pubmed/16132892>
9. Zimmerman JE, Kramer AA, McNair DS, et al.: Acute Physiology and Chronic Health Evaluation (APACHE) IV: hospital mortality assessment for today's critically ill patients [Internet]. *Critical care medicine* 2006; 34:1297–1310 Available from: <http://www.ncbi.nlm.nih.gov/pubmed/16540951>
10. Matt Dowle and Arun Srinivasan: data.table: Extension of 'data.frame' [Internet]. {2017}. Available from: {<https://CRAN.R-project.org/package=data.table>}
11. Hadley Wickham: ggplot2: Elegant Graphics for Data Analysis. Springer-Verlag New York; {2009}.
12. Kuhn M, Other contributors.: caret: Classification and Regression Training [Internet]. {2016}. Available from: {<https://CRAN.R-project.org/package=caret>}

13. R Core Team: R: A language and environment for statistical computing [Internet]. Vienna, Austria: R Foundation for Statistical Computing; 2016. Available from: <https://www.R-project.org/>
14. Bird S, Klein E, Loper E: Natural language processing with python: Analyzing text with the natural language toolkit. " O'Reilly Media, Inc." 2009.
15. Pedregosa F, Varoquaux G, Gramfort A, et al.: Scikit-learn: Machine learning in Python. *Journal of Machine Learning Research* 2011; 12:2825–2830
16. Friedman J, Hastie T, Tibshirani R: The elements of statistical learning. Springer series in statistics Springer, Berlin; 2001.
17. Weissman GE, Hubbard RA, Ungar LH, et al.: Inclusion of unstructured text data from clinical notes improves early prediction of death or prolonged ICU stay among hospitalized patients. In: A22. health services highlights in critical care. Am Thoracic Soc; 2017. p. A1084–A1084.
18. Nadkarni PM, Ohno-Machado L, Chapman WW: Natural language processing: an introduction. *J Am Med Inform Assoc* 2011; 18:544-551.
19. Xu H, Stetson PD, Friedman C: A Study of Abbreviations in Clinical Notes. *AMIA Annual Symposium Proceedings*. 2007;2007:821-825.
20. Wang MD, Khanna R, Najafi N: Characterizing the Source of Text in Electronic Health Record Progress Notes. *JAMA Intern Med*. 2017;177(8):1212–1213.
21. Nikfarjam A, Emadzadeh E, Gonzalez G: Towards generating a patient's timeline: Extracting temporal relationships from clinical notes. *J Biomed* 2013;46:S40-S47.
22. Weissman GE, Harhay MO, Lugo RM, et al.: Natural language processing to assess documentation of features of critical illness in discharge documents of acute respiratory distress syndrome survivors. *Ann Am Thorac Soc* 2016; 13:1538–1545.
